# Supplementary material for: Effect of different substituents on the water-solubility and stability properties of 1 : 2 [60]fullerene derivative·gamma-cyclodextrin complexes
Source: Royal Society of Chemistry journal article supplement (doi:10.1039/c3ob41513a), 2013-01-01
Supplement: c3ob41513a.pdf [file c3ob41513a.pdf]

## **Supplementary Information**

### **Effect of different substituents on the water-solubility and stability properties of 1:2 [60]fullerene derivative•gamma-cyclodextrin complexes**

**Atsushi Ikeda,\* Akiko Hirata, Michiko Ishikawa, Jun-ichi Kikuchi, Shunsuke Mieda and Wataru Shinoda**

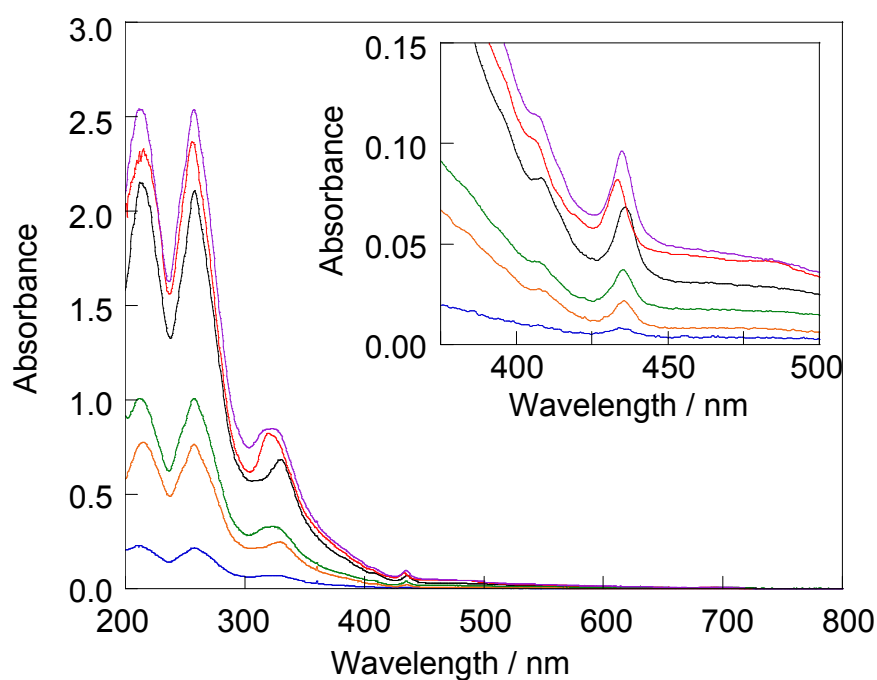

**Fig. S1** UV-vis absorption spectra of the  $\gamma$ -CDx-complexes of **1** (black line), **2** (red line), **3** (blue line), **4** (green line), **5** (purple line) and **8** (orange line). The inset shows the region of 375-500 nm. All of the spectra were measured at 25 °C (1 mm cell). All of the solutions were diluted to 1:10.

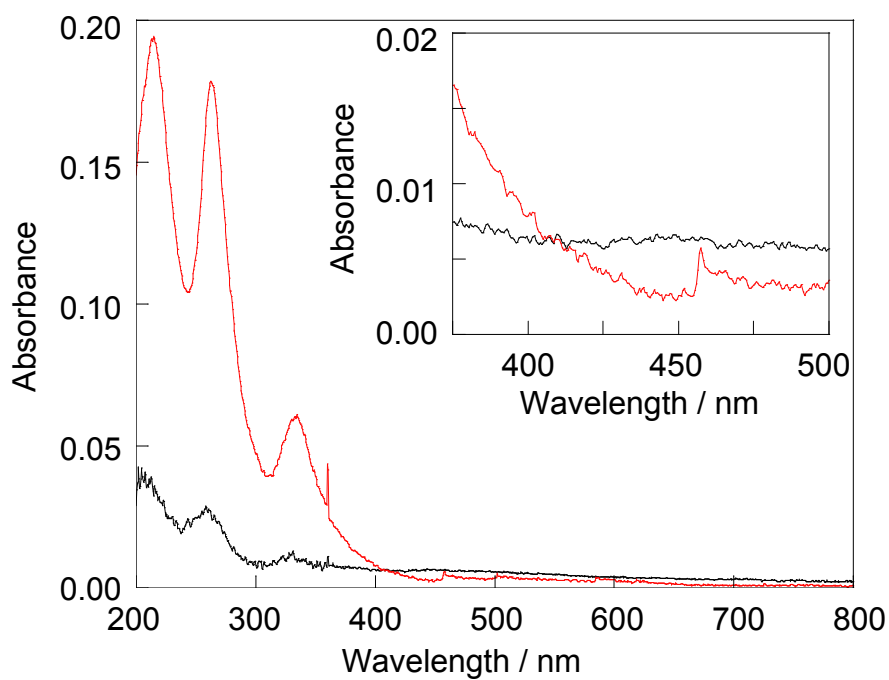

**Fig. S2** UV-vis absorption spectra of the  $\gamma$ -CDx-complexes of **13** (black line) and **14** (red line). The inset shows the region of 375-500 nm. All of the spectra were measured at 25 °C (1 mm cell). All of the solutions were diluted to 1:10.

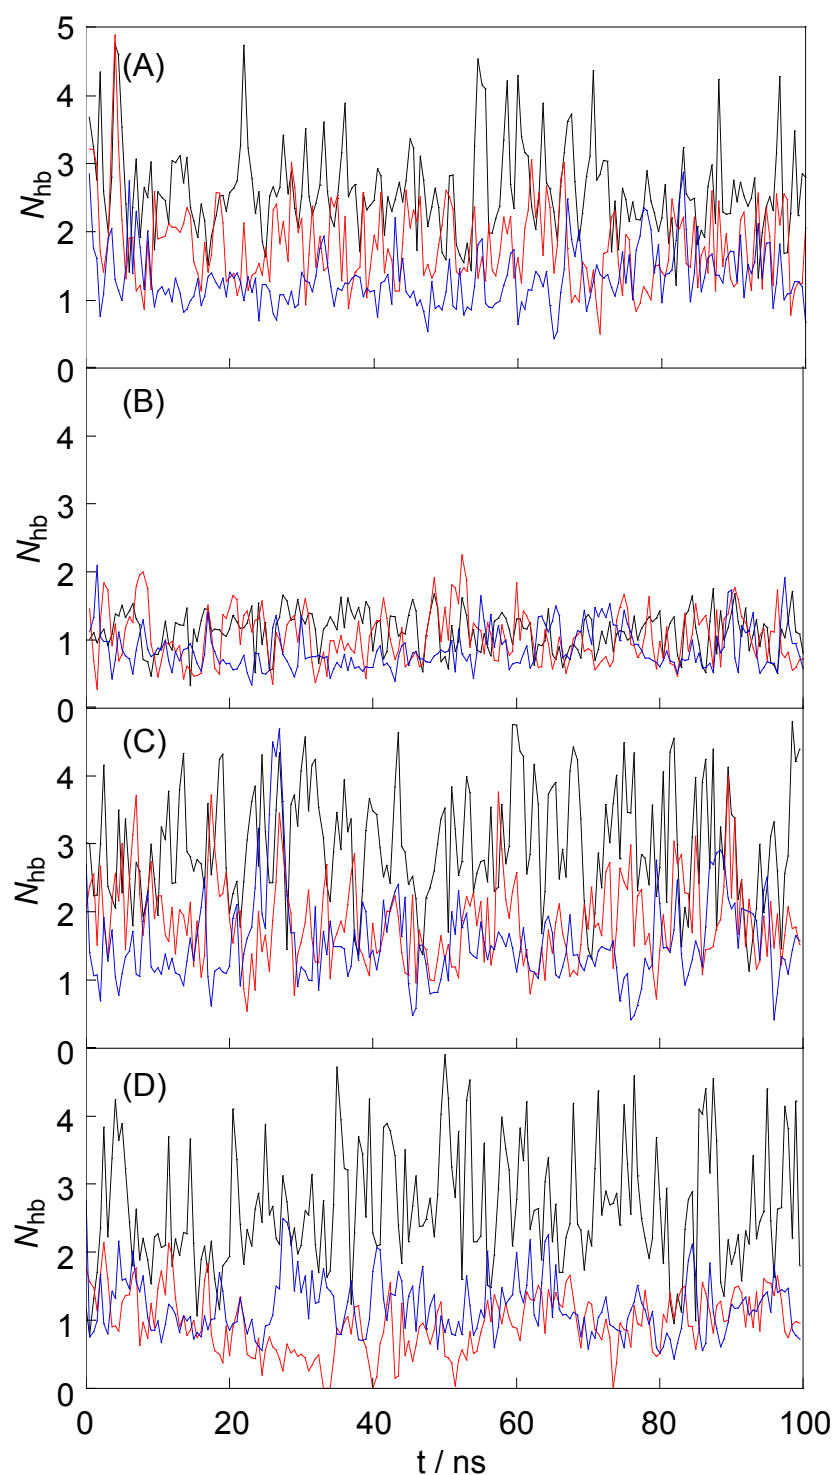

**Fig. S3** Time evolutions of the number of hydrogen bonds ( $N_{\text{hb}}$ ) between the two  $\gamma$ -CDs in the complexes with (A)  $C_{60}$ , (B)  $C_{70}$ , (C) **1** and (D) **9**. The MD simulations were performed in water (black line) and in DMSO solutions at DMSO volume fractions of 0.33 (red line) and 0.50 (blue line). The block-averaged  $N_{\text{hb}}$  values over every 0.5 ns were plotted.

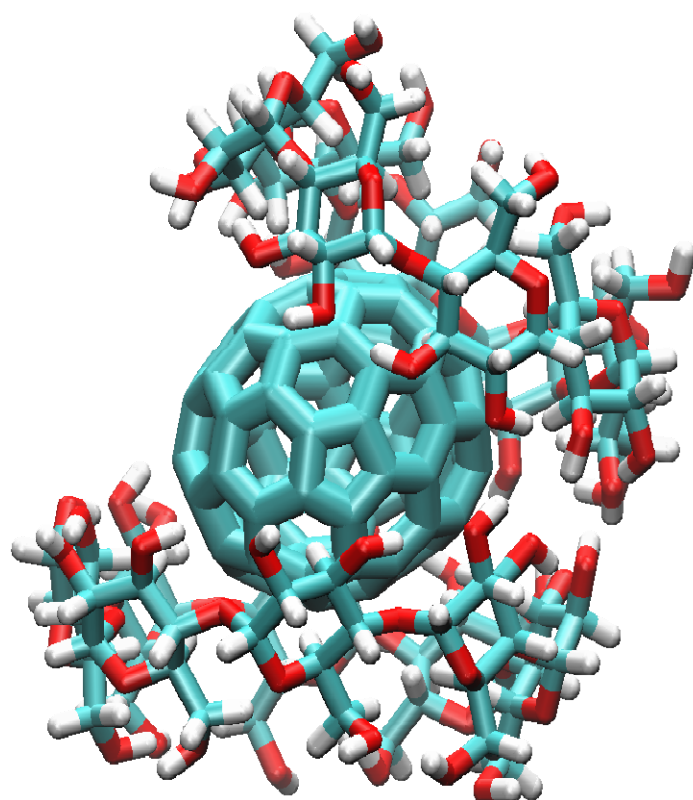

**Fig. S4** Snapshot of the  $C_{70}\bullet$ - $\gamma$ -CDx complex from the MD simulation. The carbon atoms are shown in cyan, oxygen atoms in red and hydrogen atoms in white.

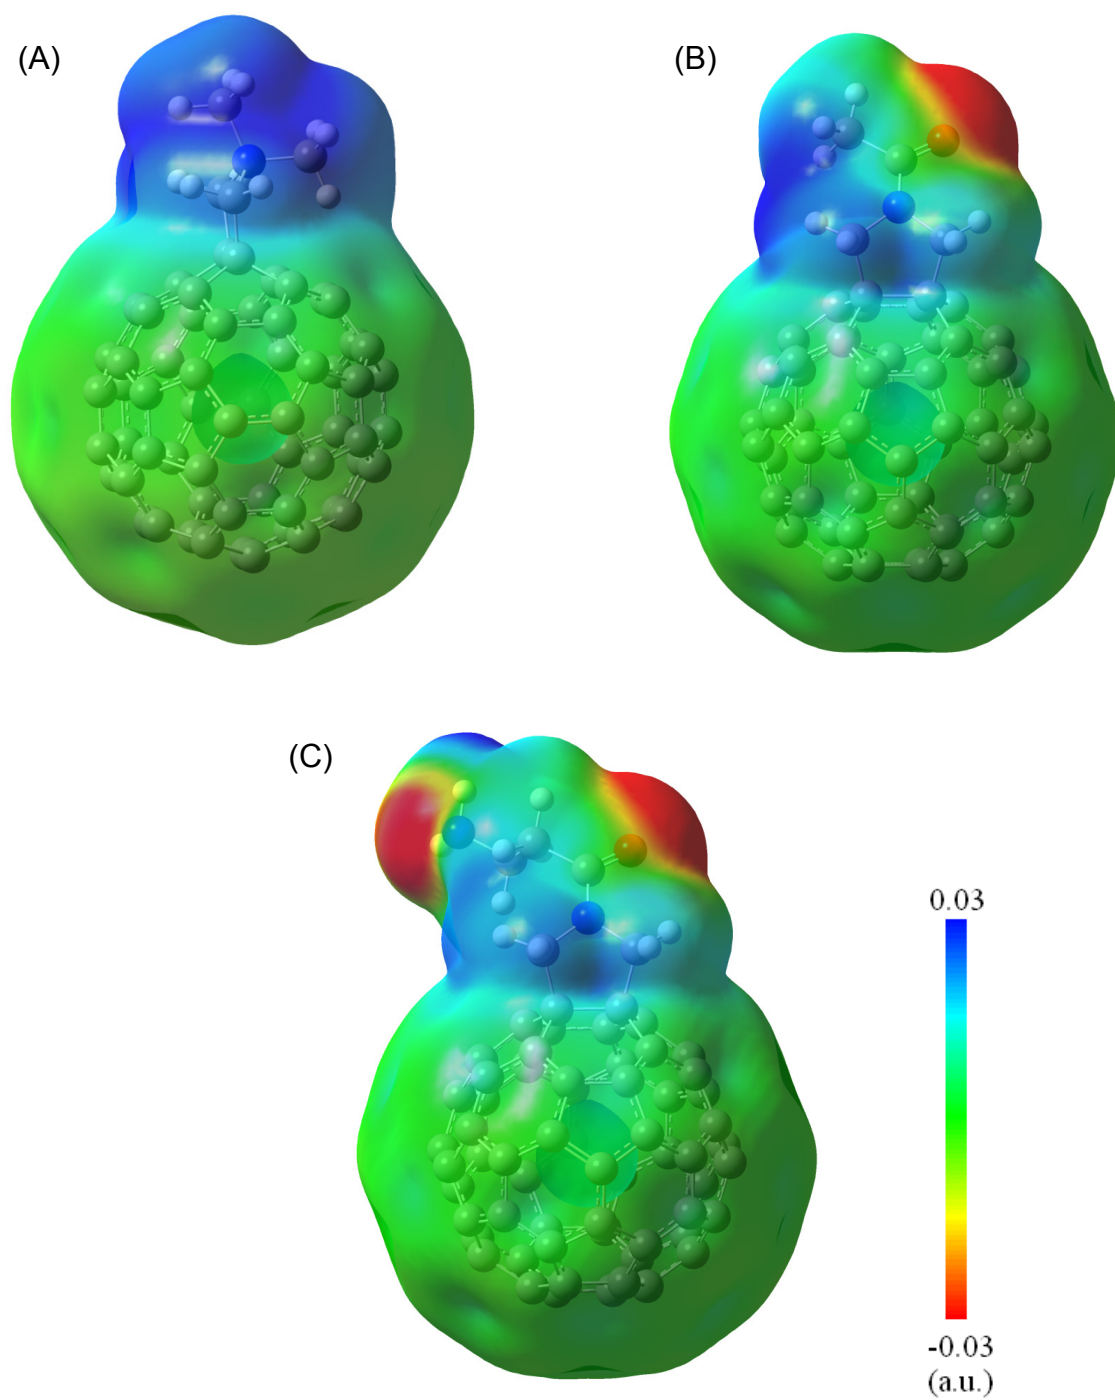

**Fig. S5** Electrostatic potential maps of (A) **2**, (B) **3** and (C) **5**. The red and blue surfaces mean negatively- and positively-polar, respectively.

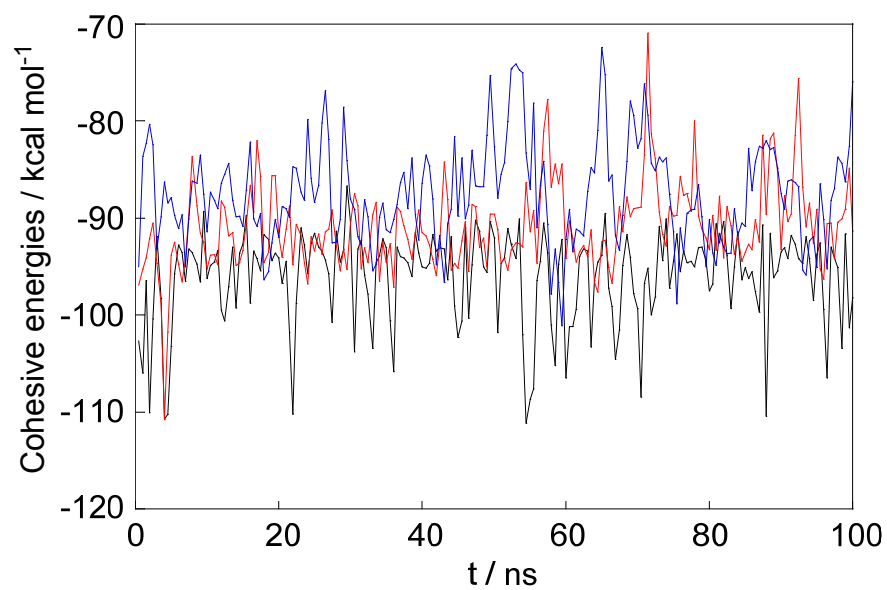

**Fig. S6** Time evolutions of the number of cohesive energies (kcal/mol) of the  $C_{60}\bullet\gamma$ -CDx complex [DMSO/(H<sub>2</sub>O + DMSO) = 0 (black), 33 (red) and 50 (blue) vol%].

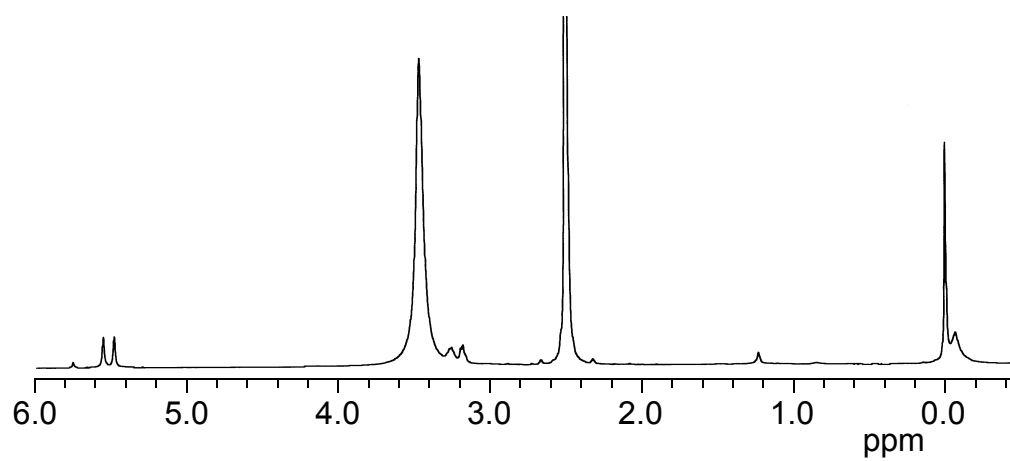

**Fig. S7**  $^1\text{H}$  NMR spectrum of **5** (400 MHz,  $\text{DMSO}-d_6$ , TMS, 25 °C).



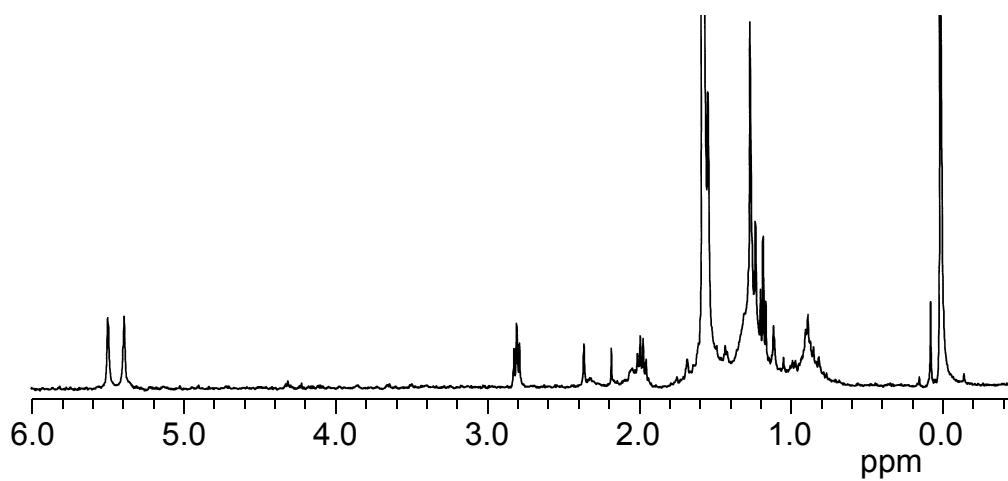

**Fig. S8**  $^1\text{H}$  NMR spectrum of **6** (400 MHz,  $\text{CDCl}_3$ , TMS, 25 °C).

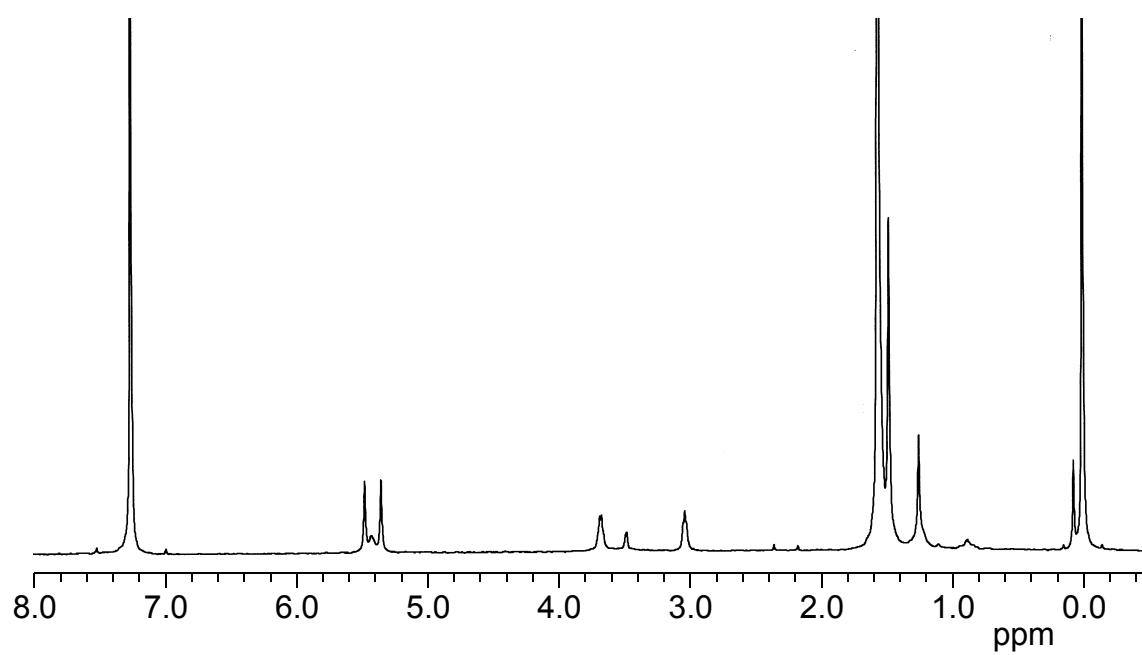

**Fig. S9**  $^1\text{H}$  NMR spectrum of **7** (400 MHz,  $\text{CDCl}_3$ , TMS, 25 °C).
